# Supplementary material for: Kinetically induced intermolecular association: unusual enthalpy changes in the nematic phase of a novel dimeric liquid-crystalline moleculeElectronic supplementary information (ESI) available: photomicrographs of the nematic phase formed by BOPPHB on cooling, X-ray diffraction patterns and DSC thermograms. See http://www.rsc.org/suppdata/cc/b2/b204901p/
Source: Royal Society of Chemistry journal article supplement (doi:10.1039/b204901p), 2002-08-15
Supplement: b204901p3.pdf [file b204901p3.pdf]

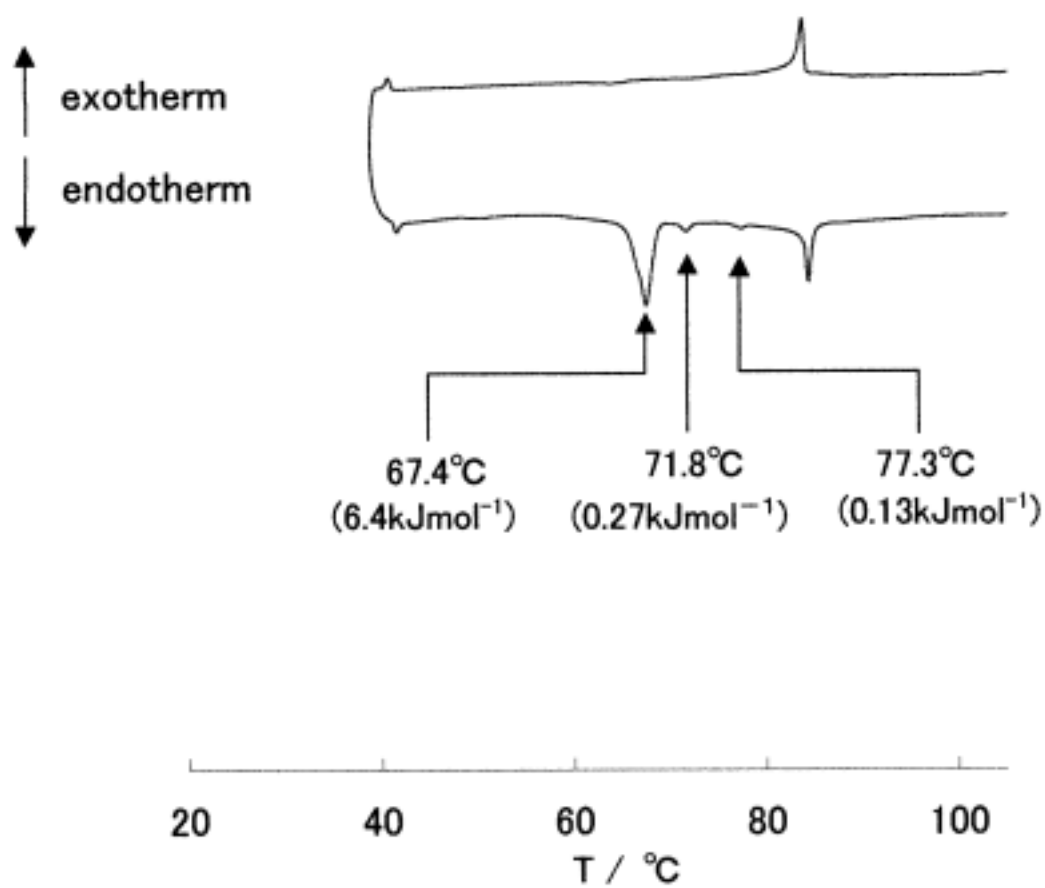

Fig. S3 DSC thermograms for cooling and heating cycles of another sample of **BOPPHB** at a scanning rate of 5 °C min<sup>-1</sup>.
